# Supplementary material
Source: PubMed Central journal article supplement (PMC6422094)
Supplement: supp_RA118.007221_142413_1_supp_267221_pl8v7h.pdf [file supp_RA118.007221_142413_1_supp_267221_pl8v7h.pdf]

## Supporting Information

CpeF is the bilin lyase that ligates the doubly linked phycoerythrobilin on  $\beta$ -phycoerythrin in the cyanobacterium *Fremyella diplosiphon*

Christina M. Kronfel, Carla V. Hernandez, Jacob P. Frick, Leanora S. Hernandez, Andrian Gutu, Jonathan A. Karty, M. Nazim Boutaghou, David M. Kehoe, Richard B. Cole, and Wendy M. Schluchter

Fig. S1: Doubly bound PEB structure, the *peb* operon and modeled CpeF structure

Fig. S2: Phenotypes of *F. diplosiphon* strains grown in  $\sim 15 \mu\text{mol m}^{-2} \text{s}^{-1}$  of green light

Fig. S3: Recombinant CpeF coexpressions with HT-CpeBA

Table S1: Spectral properties of PBS purified from WT and  $\Delta cpeF$

Table S2: Observed MALDI-MS peaks of tryptic digested recombinant HT-CpeB peptides

Table S3: Oligonucleotide primers used in this study

Table S4: Plasmids used in this study

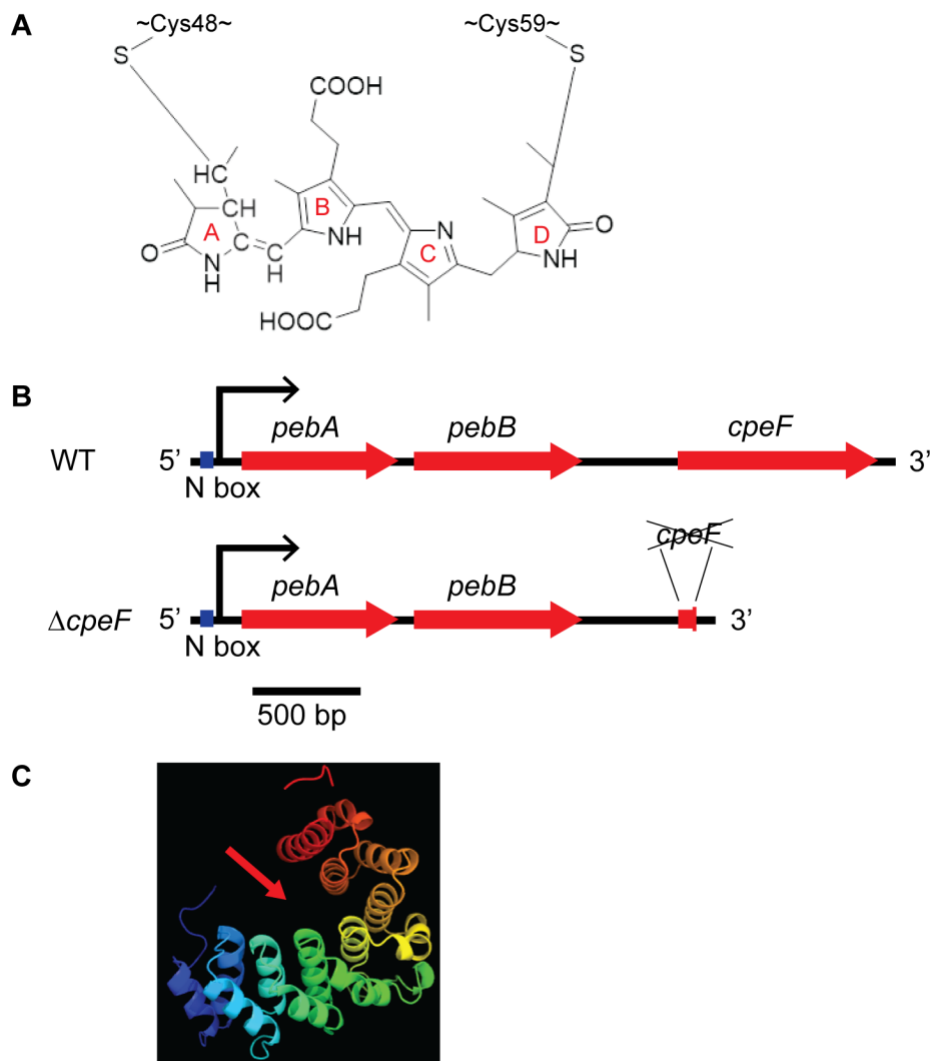

**Fig. S1: Doubly bound PEB structure, the *peb* operon and modeled CpeF structure**

(A) Structure of PEB doubly bound to specific Cys residues (Cys-48 and Cys-59 of CpeB from *F. diplosiphon*) of phycobiliproteins by thioether linkages to the A and D rings (1). (B) Diagrams of the *peb* operon containing the genes that encode the PEB synthesis proteins (PebA and PebB) and the bilin lyase CpeF from WT and  $\Delta cpeF$  strains of *F. diplosiphon*. Possible transcription regulation site is labeled “N box” (2). (C) Predicted 3D structure of CpeF from *F. diplosiphon* using Phyre<sup>2</sup> prediction system (3,4). The red arrow indicates the possible PEB binding location in the groove of CpeF.

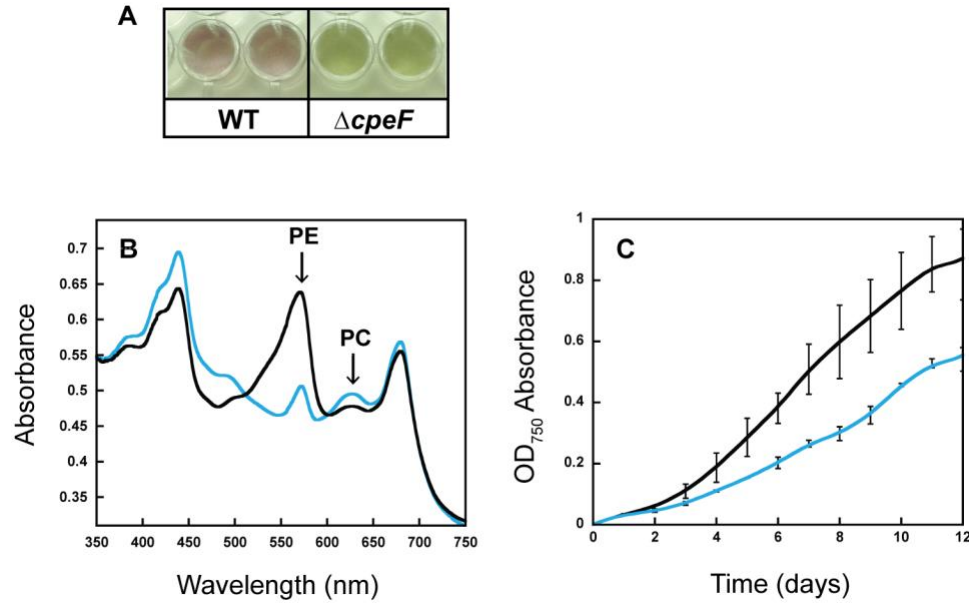

**Fig. S2: Phenotypes of *F. diplosiphon* strains grown in  $\sim 15 \mu\text{mol m}^{-2} \text{s}^{-1}$  of green light**

(A) Liquid cell cultures of WT and  $\Delta cpeF$  *F. diplosiphon* grown in approximately  $\sim 15 \mu\text{mol m}^{-2} \text{s}^{-1}$  of green light. (B) Whole cell absorbance spectra of WT (black line) and  $\Delta cpeF$  (cyan line) cells. PE and PC peaks are indicated with arrows. (C) Average growth curves of two independent replicates each for WT (black line) and  $\Delta cpeF$  (cyan line) cells with OD readings taken at 750 nm every 24 hours for 12 days. Error bars represent the ranges.

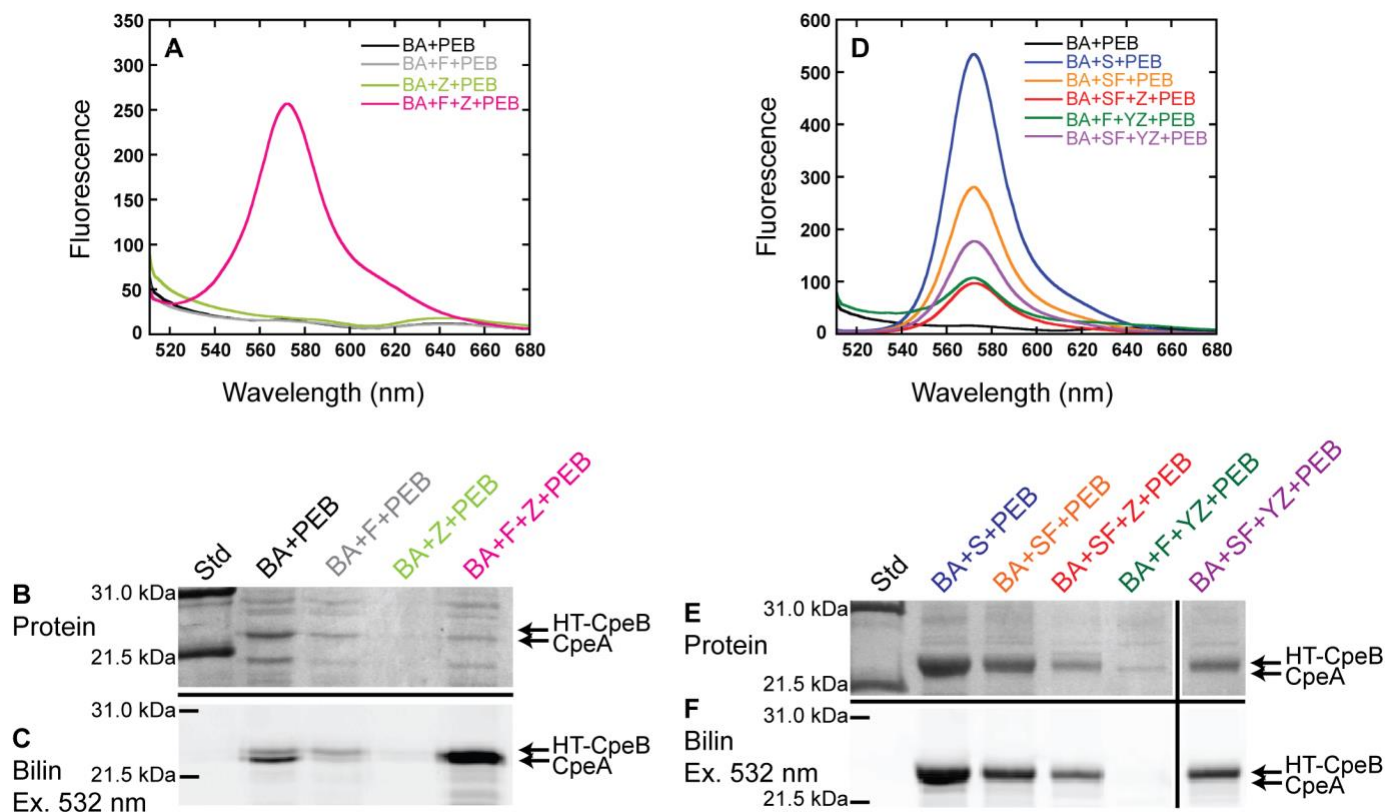

**Fig. S3: Recombinant CpeF coexpressions with HT-CpeBA**

(A) Fluorescence emission (excitation set at 490 nm) spectra of purified HT-CpeBA obtained from *E. coli* cells expressing pCpeBA and pNT-PebS (BA+PEB; black) in addition to pCpeF2 (BA+F+PEB; grey); pNT-CpeZ3 (BA+Z+PEB; lime green); or pCpeF2 and pNT-CpeZ3 (BA+F+Z+PEB; magenta). All spectra were obtained using undiluted samples. (B) The Coomassie-stained SDS-polyacrylamide gel for purified HT-CpeBA samples from panel A. Lane “Std” indicates the molecular weight standard. (C) The Zn-enhanced fluorescence of the gel in panel B excited at 532 nm. (D) Fluorescence emission (excitation set at 490 nm) spectra of purified HT-CpeBA obtained from *E. coli* cells expressing pCpeBA and pNT-PebS (BA+PEB; black) in addition to pCpeS (BA+S+PEB; blue); pCpeSF2 (BA+SF+PEB; orange); pCpeSF2 and pNT-CpeZ3 (BA+SF+Z+PEB; red); pCpeF2 and pNT-CpeYZ (BA+F+YZ+PEB; green); or pCpeSF2 and pNT-CpeYZ (BA+SF+YZ+PEB; purple). All spectra were obtained by diluting the samples 151-fold except for the two samples BA+PEB and BA+F+YZ+PEB which were undiluted. (E) The Coomassie-stained SDS-polyacrylamide gel for purified HT-CpeBA samples from panel D. Lane “Std” indicates the molecular weight standard. (F) The Zn-enhanced fluorescence of the gel in panel E excited at 532 nm. These results are representative of three independent replicates.

**Table S1: Spectral properties of PBS purified from WT and  $\Delta$ cpeF**

| Strain and fraction  | PE Abs $\lambda_{\max}$ (nm) | PC Abs $\lambda_{\max}$ (nm) | AP Abs $\lambda_{\max}$ (nm) | Fluorescence emission $\lambda_{\max}$ (nm) excited at 490 nm |
|----------------------|------------------------------|------------------------------|------------------------------|---------------------------------------------------------------|
| WT bottom            | 568                          | 615                          | 649                          | 582 (sh), 669                                                 |
| $\Delta$ cpeF middle | 577                          | 617                          | 649                          | 576 (sh), 673                                                 |
| $\Delta$ cpeF bottom | 577                          | 617                          | 649                          | 576 (sh), 673                                                 |

“Abs” is an abbreviation for absorbance.

“sh” is an abbreviation for shoulder in the spectrum.

**Table S2: Observed MALDI-MS peaks of tryptic digested recombinant HT-CpeB peptides**

| Sample *   | CpeB Cys-80 ( $m/z$ ) | CpeB Cys-165 ( $m/z$ ) | CpeB Cys-48/Cys-59 ( $m/z$ ) |
|------------|-----------------------|------------------------|------------------------------|
| B+F+PEB    | ND                    | ND                     | ND                           |
| B+S+PEB    | 1250.7                | ND                     | ND                           |
| B+S+F+PEB  | 1250.7                | ND                     | ND                           |
| BZ+F+PEB   | ND                    | ND                     | ND                           |
| BZ+S+PEB   | 1250.7                | ND                     | ND                           |
| BZ+S+F+PEB | 1250.7                | ND                     | 4627.4                       |

CpeB peptides contain a PEB chromophore (587  $m/z$ ) at the specified Cys residues when indicated by an  $m/z$  value which are represented with a +1 charge state.

“ND” represents PEB modified peptides that were not detected in MS results.

\* See Fig. 4 for sample descriptions.

**Table S3: Oligonucleotide primers used in this study**

| Primer name <sup>a</sup> | Sequence (5' to 3') <sup>b</sup>                                | Plasmid(s) created                  |
|--------------------------|-----------------------------------------------------------------|-------------------------------------|
| cpeF-f2                  | CCAACAGAGGAAGATCCCCGCGCAAATTGA<br>ACGTCAATCCGAAGAAGATGATTGGTAAC | <i>cpeF</i> deletion<br>construct   |
| cpeF-r                   | CGGATTGACGTTCAATTTGCGCGGGATCTT<br>CCTCTGTTGGAGCTTCTG            | <i>cpeF</i> deletion<br>construct   |
| Nco-cpeF-r2              | TC <u>ACCATGG</u> ATTACATCAACGTGCAGGTAG<br>C                    | <i>cpeF</i> deletion<br>construct   |
| Nco-cpeF-f               | TC <u>ACCATGG</u> CCATTCCCCAGGACTAGACT<br>ATCAGGTGAGCGATCGCGG   | <i>cpeF</i> deletion<br>construct   |
| FdcpeA.R.EcoRI           | AAGAATTCCTAGGAGAGAGAGTTAATAGC<br>GTA                            | pCpeBA                              |
| HTcpeB.F.BamHI           | A <u>AGGATCC</u> GATGCTTGATGCTTTTTCTAGA<br>GC                   | pCpeB2; pCpeBA;<br>pCpeBZ           |
| HTcpeB.R.EcoRI           | CCGAATTCCTTAGCTCAAAGCAGAGATTACG<br>CG                           | pCpeB2; pCpeBA;<br>pCpeBZ           |
| FdCpeB(C48S)             | [phos]CAACGCTAGCTCCATGGTTTCTG                                   | pCpeB(C48S)CpeA                     |
| FdCpeB(C59S)             | [phos]CTGGAATGATCTCCGAAAACCAA<br>GG                             | pCpeB(C59S)CpeA                     |
| pETDuet(XhoI<br>del)     | [phos]ACGTCGGTACCCTCCAGTCTGGTA<br>AAGAAACCGCTG                  | pCpeB(C48S)CpeA;<br>pCpeB(C59S)CpeA |
| HTcpeF2.F.XhoI           | GCTCGAGAAGTCAATCACTCAACTCAG                                     | pHT-CpeF2                           |
| HTcpeF2.R.HindIII        | CCAAGCTTCCAATCATCTTCTTCGG                                       | pHT-CpeF2                           |
| FdcpeF.F.NdeI            | AATTTGTGCATATGAGTCAATCACTCAACT<br>CAGAA                         | pCpeF2; pCpeSF2                     |
| FdcpeF.R.XhoI            | AACTCGAGTTACCAATCATCTTCTTCGGAT<br>TG                            | pCpeF2; pCpeSF2                     |
| FdcpeS.F.NcoI            | AACCATGGAAACCAAAGTGTGATGAATAT<br>TACA                           | pCpeSF2                             |
| FdcpeS.R.PstI            | AACTGCAGCTAGGCACCAGTGTTTATGAAA<br>AAATG                         | pCpeSF2                             |
| FdcpeY.F.BglIII          | GATCAGATCTATGGATAAGCGCTTTTTTAA<br>TTTC                          | pNT-CpeYZ                           |
| FdcpeZ.R.XhoI            | GATCCTCGAGTTATTTTCTCCCCGCTG                                     | pNT-CpeYZ                           |
| cpeZ.F.EcoRV             | TGGATATCGATGCCGACAACAGAAG                                       | pCpeBZ; pNT-CpeZ3                   |
| cpeZ.R.XhoI              | CACTCGAGTTTATTTTCTCCCCGCT                                       | pCpeBZ; pNT-CpeZ3                   |

<sup>a</sup>“F” and “R” are the forward and reverse primers, respectively.

<sup>b</sup> Engineered restriction enzyme sites are underlined.

**Table S4: Plasmids used in this study**

| Plasmid name <sup>a</sup> | Recombinant proteins produced <sup>b</sup>                    | Parent vector           | Antibiotic <sup>c</sup> | Reference  |
|---------------------------|---------------------------------------------------------------|-------------------------|-------------------------|------------|
| pPebS                     | Myovirus HO1 and HT-PebS                                      | pACYCDuet-1             | Cm                      | (5)        |
| pNT-PebS                  | Myovirus HO1 and PebS                                         | pACYCDuet-1             | Cm                      | (6)        |
| pCpeB2                    | <i>F. diplosiphon</i> HT-CpeB                                 | pCDFDuet-1              | Sp                      | This study |
| pCpeBA                    | <i>F. diplosiphon</i> HT-CpeB and CpeA co-expressed on 1 mRNA | pETDuet-1               | Ap                      | This study |
| pCpeB(C48S)CpeA           | <i>F. diplosiphon</i> HT-CpeB(C48S) and CpeA                  | pCpeBA                  | Ap                      | This study |
| pCpeB(C59S)CpeA           | <i>F. diplosiphon</i> HT-CpeB(C59S) and CpeA                  | pCpeBA                  | Ap                      | This study |
| pCpeBZ                    | <i>F. diplosiphon</i> HT-CpeB and CpeZ                        | pCpeB2                  | Sp                      | This study |
| pCpeF2                    | <i>F. diplosiphon</i> CpeF                                    | pCDFDuet-1              | Sp                      | This study |
| pHT-CpeF2                 | <i>F. diplosiphon</i> HT-CpeF                                 | pBAD- <i>Myc</i> -His A | Ap                      | This study |
| pCpeS                     | <i>F. diplosiphon</i> CpeS                                    | pCOLADuet-1             | Km                      | (7)        |
| pCpeSF2                   | <i>F. diplosiphon</i> CpeS and CpeF                           | pCDFDuet-1              | Sp                      | This study |
| pNT-CpeYZ                 | <i>F. diplosiphon</i> CpeY and CpeZ                           | pCOLADuet-1             | Km                      | This study |
| pNT-CpeZ3                 | <i>F. diplosiphon</i> CpeZ                                    | pCOLADuet-1             | Km                      | This study |

<sup>a</sup> “NT-” is an abbreviation for “Non-Tagged” referring specifically to hexahistidine-tags.

<sup>b</sup> Proteins produced as hexahistidine-tagged fusions are indicated as “HT-”.

<sup>c</sup> Antibiotic resistance used to select for presence of the plasmid (Ap: ampicillin; Cm: chloramphenicol; Km: kanamycin; Sp: spectinomycin).

## References

1. Ficner, R., Lobeck, K., Schmidt, G., and Huber, R. (1992) Isolation, crystallization, crystal structure analysis and refinement of B-phycoerythrin from the red alga *Porphyridium sordidum* at 2.2 Å resolution. *J. Mol. Biol.* **228**, 935-950
2. Alvey, R. M., Karty, J. A., Roos, E., Reilly, J. P., and Kehoe, D. M. (2003) Lesions in phycoerythrin chromophore biosynthesis in *Fremyella diplosiphon* reveal coordinated light regulation of apoprotein and pigment biosynthetic enzyme gene expression. *Plant Cell* **15**, 2448-2463
3. Kelley, L. A., Mezulis, S., Yates, C. M., Wass, M. N., and Sternberg, M. J. E. (2015) The Phyre2 web portal for protein modeling, prediction and analysis. *Nat. Protocols* **10**, 845-858
4. Zhao, C., Höppner, A., Xu, Q.-Z., Gärtner, W., Scheer, H., Zhou, M., and Zhao, K.-H. (2017) Structures and enzymatic mechanisms of phycobiliprotein lyases CpcE/F and PccE/F. *Proc. Natl. Acad. Sci.* **114**, 13170-13175
5. Dammeyer, T., Bagby, S. C., Sullivan, M. B., Chisholm, S. W., and Frankenberg-Dinkel, N. (2008) Efficient phage-mediated pigment biosynthesis in oceanic cyanobacteria. *Curr. Biol.* **18**, 442-448
6. Kronfel, C. M., Biswas, A., Frick, J. P., Gutu, A., Blensdorf, T., Karty, J. A., Kehoe, D. M., and Schluchter, W. M. (2018) Biogenesis of phycoerythrin. I. Defining the roles of the chaperone-like protein CpeZ and the phycoerythrobilin lyase CpeY in *Fremyella diplosiphon*. *Biochimica et Biophysica Acta (BBA) - Bioenergetics*, Under Review
7. Biswas, A., Boutaghou, M. N., Alvey, R. M., Kronfel, C. M., Cole, R. B., Bryant, D. A., and Schluchter, W. M. (2011) Characterization of the Activities of the CpeY, CpeZ, and CpeS Bilin Lyases in Phycoerythrin Biosynthesis in *Fremyella diplosiphon* Strain UTEX 481. *J. Biol. Chem.* **286**, 35509-35521
